# Supplementary material
Source: PubMed Central journal article supplement (PMC6018350)
Supplement: JB.00760-17_zjb014184809s1.pdf [file JB.00760-17_zjb014184809s1.pdf]

1 **Supplemental Material**

2 **Two DD-carboxypeptidases from *Mycobacterium smegmatis* affect cell surface**  
3 **properties through regulation of peptidoglycan cross-linking and**  
4 **glycopeptidolipids**

5 Satya Deo Pandey, Shilpa Pal, Ganesh Kumar N, Ankita Bansal, Sathi Mallick and Anindya S  
6 Ghosh\*

7 **Affiliation:** Department of Biotechnology, Indian Institute of Technology Kharagpur, West  
8 Bengal, India, PIN-721 302

9 **\*Corresponding author:** Anindya S Ghosh, Department of Biotechnology, Indian Institute of  
10 Technology Kharagpur, West Bengal, India, PIN-721302

11 **E-mail:** [anindvain@yahoo.com](mailto:anindvain@yahoo.com)

12

13

14

15

16

17

18

19

20 **Figure S1: The structure of the *M. smegmatis* non-serovar specific GPL.**

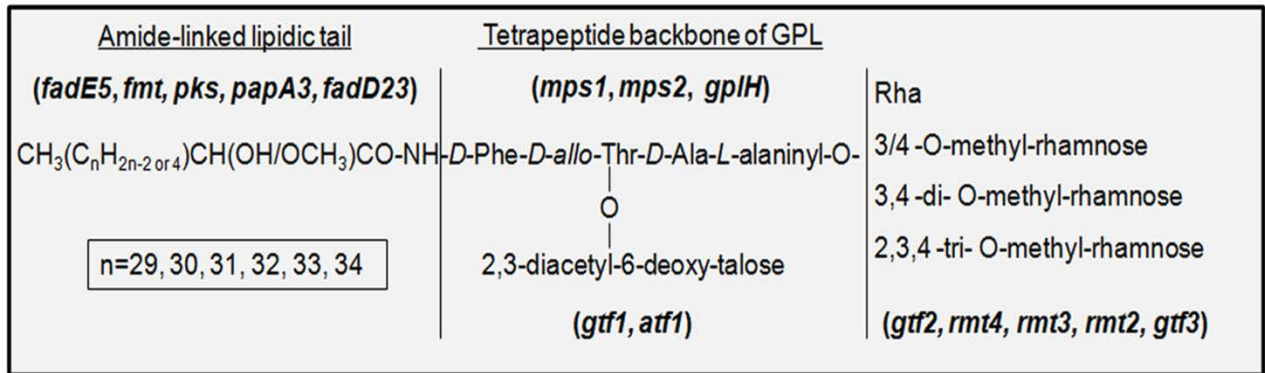

21

22 **Fig. S1.** The structure of the *M. smegmatis* non-serovar specific GPL. Genes involved in the  
 23 biosynthesis of respective parts shown in bold italicize letters. Expansion of genes are as follows;  
 24 *mps* (mycobacterial peptide synthetase), *gplH* (glycopeptidolipid *mbtH*-like gene), *pks*  
 25 (polyketide synthase), *fad* (fatty acid desaturase), *fmt* (fatty acid O-methyltransferase), *pap*  
 26 (polyketide associated protein), *gtf* (glycosyltransferase), *rmt* (rhamnosyl methyltransferase), *atf*  
 27 (acetyltransferase), *tntpC* (MmpL family transmembrane protein) and *gap* (GPL addressing  
 28 protein).

29

30

31

32

33

34

35 **Figure S2. Deletion of *msmeg\_2433* from *M. smegmatis* mc<sup>2</sup>155 chromosome.**

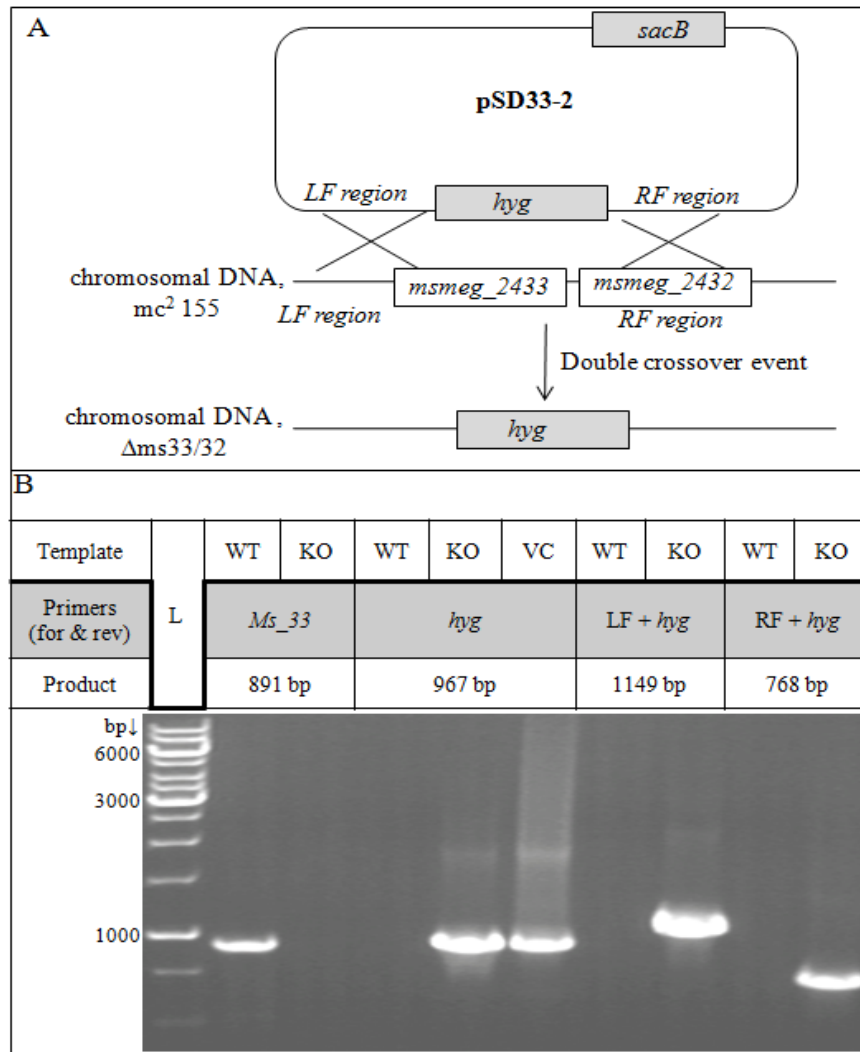

36

37 **Fig. S2.** Deletion of *msmeg\_2433* from *M. smegmatis* mc<sup>2</sup>155 chromosome. (A) Schematic  
 38 representation of double-crossover event during homologous recombination. The non-replicative  
 39 plasmid pSD33-2 was constructed from a mycobacterial suicide vector, pSMT100 bearing *sacB*  
 40 and hygromycin cassette, by stepwise cloning of left flanking (LF) and right flanking (RF)  
 41 region of *msmeg\_2433*, on both side of the hygromycin cassette. The pSD33-2 was then

42 transformed into electrocompetent *M. smegmatis* mc<sup>2</sup>155, and knockout mutant  $\Delta$ *ms33/32* was  
43 selected on Middlebrook 7H11 plate containing hygromycin and 10% sucrose. The expression of  
44 levansucrase (from SacB) is lethal therefore, single crossed over strain cannot grow on the plate  
45 (1). Later, it was found to be a double mutant of *msmeg\_2433* and *msmeg\_2432* due to the polar  
46 effect (Fig. 1). (B) Confirmation of the mutant strain by PCR using various set of primers (refer  
47 Table S1). The WT (mc<sup>2</sup>155), KO ( $\Delta$ *ms33/32*) and VC (vector control; pSMT100 harboring  
48 hygromycin, used as positive control) were used as templates for the respective primer pairs  
49 (shown in the figure). The expected size of amplicons is shown in 1% agarose gel. 'L' represents  
50 DNA ladder.

51

52

53

54

55

56

57

58

59

60

61

62 **Figure S3. Multiple sequence alignment of protein sequence of DacB2 (Rv2911) of *M.***  
 63 ***tuberculosis*, MSMEG\_2433 and MSMEG\_2432 of *mc*<sup>2</sup>155 using CLUSTALW.**

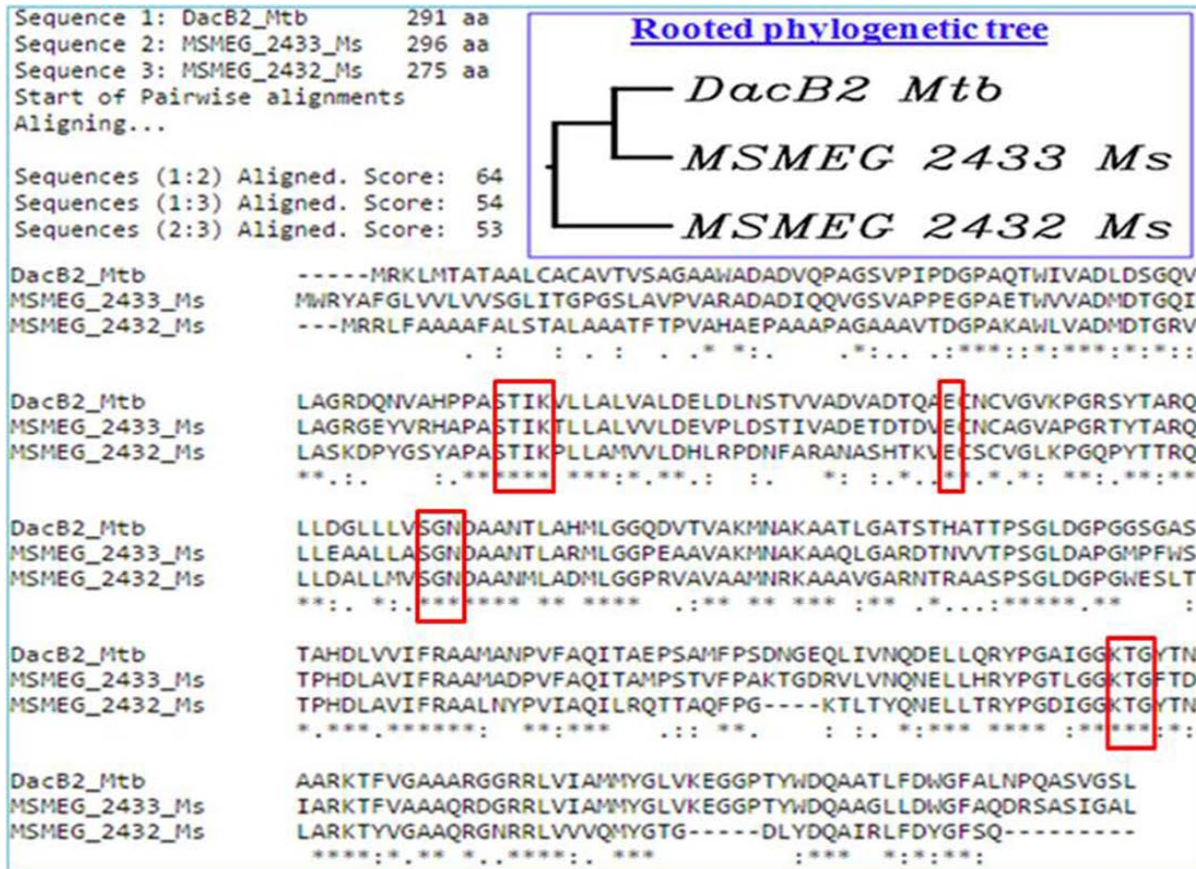

64

65 **Fig. S3. Multiple sequence alignment of protein sequence of DacB2 (Rv2911) of *M.***  
 66 ***tuberculosis*, MSMEG\_2433 and MSMEG\_2432 of *M. smegmatis* using CLUSTALW. The red**  
 67 **highlighted rectangles STIK, SGN and KTG shows the signature motifs of low molecular mass**  
 68 **penicillin-binding proteins (LMM-PBPs) (2). DacB2 and MSMEG\_2433 are characterized as**  
 69 **DD-CPases (3, 4) whereas highlighted ‘E’ in the Ω-like loop of MSMEG\_2433 is reported to be**  
 70 **responsible for the additional β-lactamase activity (3). Alignment scores are indicated in the**  
 71 **figure and the inset represents the rooted phylogenetic relations of the three proteins.**

72

73 **Figure S4. Membrane localization of MSMEG\_2433 and Rv2911 (DacB2) and  $\beta$ -lactamase**  
74 **assay.**

75

76

77

78

79

80

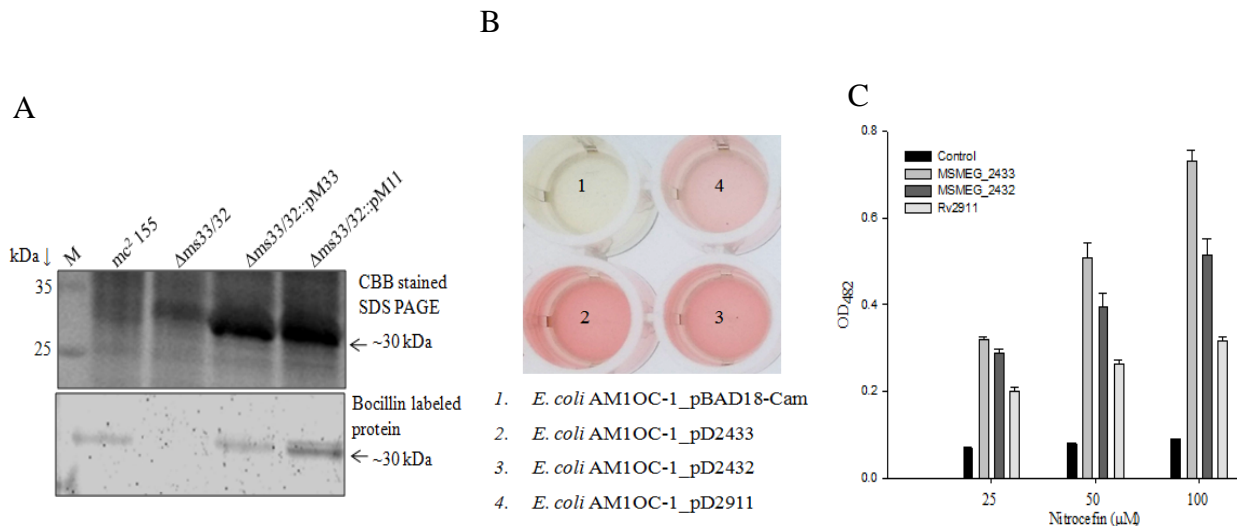

81 **Fig. S4.** Membrane localization of MSMEG\_2433 and Rv2911 and  $\beta$ -lactamase assay. Panel  
82 (A) Upper panel, the coomassie brilliant blue (CBB) stained 15% SDS PAGE gel showing  
83 membrane proteins isolated from the 4-mycobacterial strains, and the panel below indicates the  
84 bocillin-FL (fluorescent tagged penicillinV; binds only to the PBPs) labeled proteins scanned  
85 using Typhoon (refer Methods for detail). M, represents the protein molecular weight marker.  
86 Panel (B) shows the hydrolysis of nitrocefin in presence of MSMEG\_2433, MSMEG\_2432 and  
87 Rv2911 to prove the  $\beta$ -lactamase activities of these proteins that we claimed a reason of disparity  
88 in the band intensities of panel (A)'s CBB stained and bocillin labeled protein bands. We chose  
89 *E. coli* AM1OC-1 strain ( $\Delta$ *ampC*) that has no  $\beta$ -lactamase activity as negative control (number  
90 1). The strain AM1OC-1 was complemented with MSMEG\_2433, MSMEG\_2432 and Rv2911  
91 using arabinose inducible vector, pBAD18-Cam to generate AM1OC-1\_pD2433 (number 2),

92 AM10C-1\_pD2432 (number 3) and AM10C-1\_pD2911 (number 4), respectively. The  $\beta$ -  
 93 lactamase activity of the complemented strains with ectopically expressed proteins were tested  
 94 and compared against the negative control. The  $\beta$ -lactamase activity of MSMEG\_2433 has been  
 95 reported earlier (3) so that can be considered as positive control. The Whole cell lysates (2  $\mu$ g) of  
 96 all the strains were treated with 50  $\mu$ M of nitrocefin and incubated at RT for 30 min before  
 97 picture was shot. Panel (C), graph shows the nitrocefin reduction assay of whole cell lysates  
 98 from panel B treated with 25, 50 and 100  $\mu$ M of nitrocefin in triplicates incubated at RT for 30  
 99 min. Absorbance was measured at 482 nm.

100

101 **Figure S5. Structure of PG muropeptides, monomer and dimers of *Mycobacterium*.**

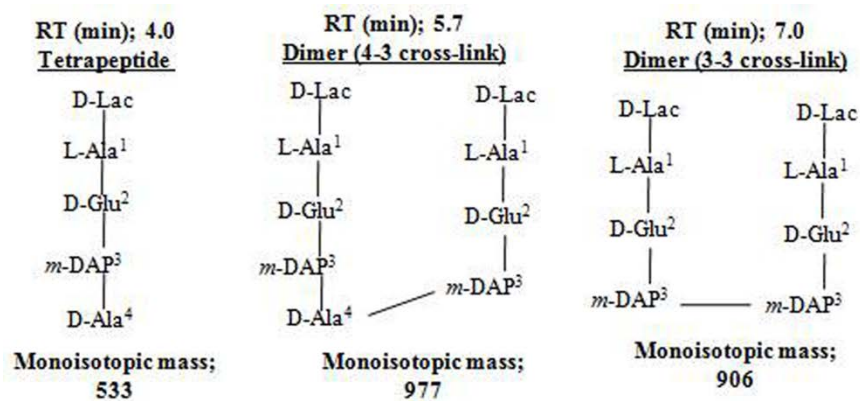

102

103 **Fig. S5.** Structure of PG muropeptides, monomer and dimers of *Mycobacterium*. Figure shows  
 104 the structures and monoisotopic masses (calculated MW) of the tetrapeptide, 4-3 and 3-3  
 105 crosslinked dimers, of mycobacterial PG muropeptides. 'RT' indicates, retention time.

106

107

108

109

110 **Figure S6. Phenotypic evaluation of single gene deleted knockout mutants of *M. smegmatis*.**

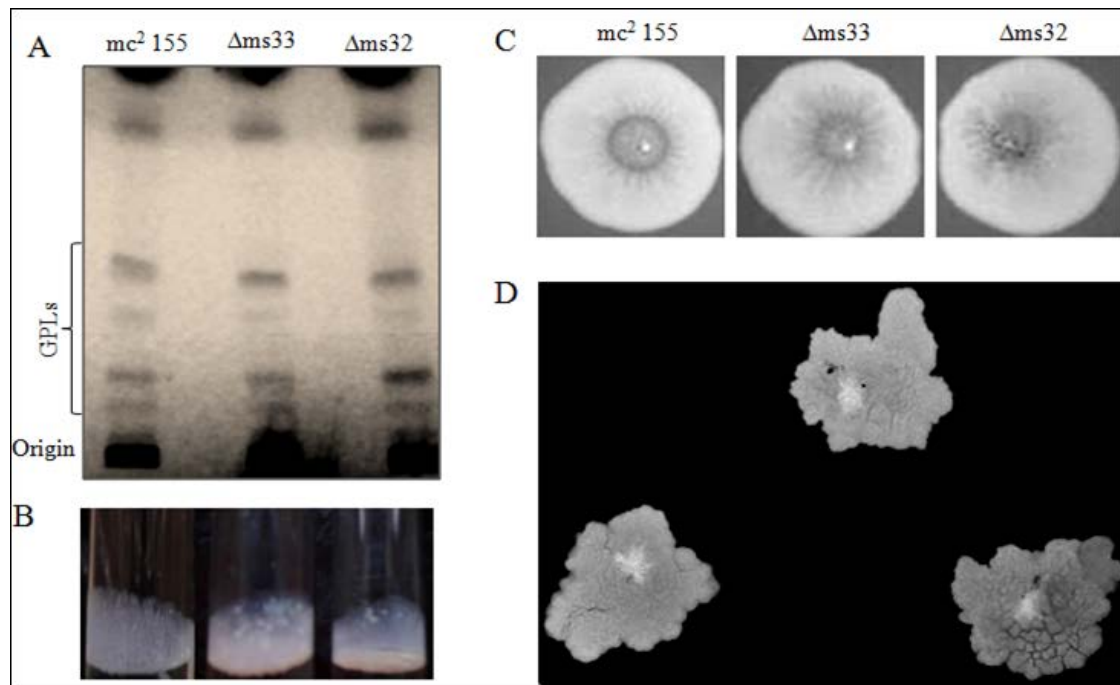

111

112 **Fig. S6.** Phenotypic evaluation of single gene deleted knockout mutants,  $\Delta$ *ms33* and  $\Delta$ *ms33* of  
113 *M. smegmatis*. Panel (A) shows the surface glycopeptidolipids (GPLs) isolated from *mc*<sup>2</sup>155,  
114 *mc*<sup>2</sup>155. $\Delta$ *msmeg*<sub>2433</sub> ( $\Delta$ *ms33*) and *mc*<sup>2</sup>155. $\Delta$ *msmeg*<sub>2432</sub> ( $\Delta$ *ms32*). Panel (B) shows the  
115 pellicle formation of the three strains on the liquid-air surface. Panel (C) and (D) represent the  
116 colony morphology of the three strains on M63 medium in presence of 0.8 % and 0.3% agarose,  
117 respectively where panel D represents the motility of the strains. Single knockout mutants show  
118 no significant difference in any of these phenotypic properties. Please refer Methodology for the  
119 experimental detail.

120



121

122

123 **Table S1. Synthesized primers used in this study.**

| Deletion of double ( <i>msmeg_2433/32</i> ) and single genes, <i>msmeg_2433</i> or <i>msmeg_2432</i> from <i>M. smegmatis</i> chromosome |                                                                                                                                                                                                                                        |                         |
|------------------------------------------------------------------------------------------------------------------------------------------|----------------------------------------------------------------------------------------------------------------------------------------------------------------------------------------------------------------------------------------|-------------------------|
| Primer name                                                                                                                              | Primer sequence (5' – 3')                                                                                                                                                                                                              | PCR product length (bp) |
| LFF_ <i>Bam</i> HI<br>LFR_ <i>Spe</i> I                                                                                                  | ATT AGG <u>GAT CCT</u> CCT TCT TCG GCG CCT TC<br>GGA <u>TAC TAG TGC</u> CTG GAG ATC CAG CAA C                                                                                                                                          | 1009                    |
| RFF_ <i>Xba</i> I<br>LFR_ <i>Pst</i> I                                                                                                   | ATG <u>TTC TAG AGC</u> CCT ACC GTC CGT AAC GTC<br>ATT AGT <u>CTG CAG TAG</u> CGC GTG AGC AAC TCG                                                                                                                                       | 689                     |
| Ms33_F<br>Ms33_R                                                                                                                         | GTAG <u>GGATCC</u> CTCGGCCAGGCTCAACATGTCTCGATTCAACACGACTA<br>GGCTGGCCGGCCATAGAGGTCCGCTGTGACACAA ( <i>Bam</i> HI)<br>TAGT <u>CTGCAG</u> CAGCGGCACCTCGTCGAGAACCACGAGCGCCAGCAGG<br>GTCTTGATGGTGCTCACAGTTCCTCCGGATCGGTGAAG ( <i>Pst</i> I) | 1070                    |
| Ms32_LF_F<br>Ms32_LF_R                                                                                                                   | ATTAGGGATCCCGACATGGACACCGGCCAGAT<br>GGATACTAGTGCAGCGGCTTGATGGTGCTCG                                                                                                                                                                    | 1031                    |
| Ms32_RF_F<br>Ms32_RF_R                                                                                                                   | GGGTTCTAGAGGCAAGACCCTGACCTATCAG<br>ATAGTCTGCAGAGGATCTGCCGCGCATCATCC                                                                                                                                                                    | 1061                    |
| Primers for the PCR - based screening of the <i>msmeg_2433</i> deleted strain; Δ <i>ms33/32</i>                                          |                                                                                                                                                                                                                                        |                         |
| Ms33_for<br>Ms33_rev                                                                                                                     | CTC TCT <i>GCT AGC</i> AGG AGG CTC TCT CTA TGT GGA GGT ACG CCT<br>TCG GGC TGG T<br>CTC TCT <i>AAG CTT</i> TCA GAG CGC CCC CGA TGC TCG CCG AA                                                                                           | 891                     |
| <i>hyg</i> _for<br><i>hyg</i> _rev                                                                                                       | ATA GAG GTC CGC TGT GAC ACA A<br>CAG TTC CTC CGG ATC GGT GAA G                                                                                                                                                                         | 967                     |
| LF+ <i>hyg</i> _for<br>LF+ <i>hyg</i> _rev                                                                                               | ATT AGG GAT CCT CCT TCT TCG GCG CCT TC<br>TTG TGT CAC AGC GGA CCT CTA T                                                                                                                                                                | 1149                    |

|                                                                                                                                                   |                                                                        |     |
|---------------------------------------------------------------------------------------------------------------------------------------------------|------------------------------------------------------------------------|-----|
| RF+ <i>hyg</i> _for                                                                                                                               | CTT CAC CGA TCC GGA GGA ACT G                                          | 768 |
| RF+ <i>hyg</i> _rev                                                                                                                               | ATT AGT <i>CTG CAG</i> TAG CGC GTG AGC AAC TCG                         |     |
| Primers for complementing $\Delta$ ms33/32 with <i>msmeg_2433</i> and <i>rv2911</i> to generate $\Delta$ ms33/32::pM33 and $\Delta$ ms33/32::pM11 |                                                                        |     |
| pM33_for                                                                                                                                          | CTC TCT <i>CAT ATG</i> _AGG AGG CTC TCT ATG TGG AGG TAC GCC TTC        | 891 |
| pM33_rev                                                                                                                                          | GGG CTG G<br>CTC TCT <i>AAG CTT</i> TCA GAG CGC CCC CGA TGC TCG CCG AA |     |
| pM32_for                                                                                                                                          | CAATATCATATGAGGAGGCTCTCTGTGCGAAGACTGTTCGCG                             | 828 |
| pM32_rev                                                                                                                                          | CTCTCTAAGCTTCTACTGGCTGAAGCCGTAGTCGAA                                   |     |
| pM11_for                                                                                                                                          | CTC TCT <i>CAT ATG</i> AGG AGG CTC TCT CTA TGC GAA AGC TCA TGA         | 876 |
| pM11_rev                                                                                                                                          | CCG CGA CCG<br>CTC TCT <i>AAG CTT</i> TCA GAG CGA GCC GAC GCT GGC CT   |     |
| Primers for RT-PCR (semi quantitative) to confirm polar effect of deletion on <i>msmeg_2432</i>                                                   |                                                                        |     |
| X_for                                                                                                                                             | CAC CGA CAT CGC GCG CAA GA                                             | 402 |
| Y_rev                                                                                                                                             | ATG TCG GCG ACC AGC CAC GCC TT                                         |     |
| X1_for (with Y)                                                                                                                                   | CTT CAC CGA TCC GGA GGA ACT G                                          | 316 |
| X2_for (with Y)                                                                                                                                   | CAA TAT CAT ATG AGG AGG CTC TCT GTG CGA AGA CTG TTC GCG                | 155 |
| 16SrRNA_F                                                                                                                                         | GTG GAC TAC CAG GGT ATC TAA TCC T                                      | 76  |
| 16SrRNA_R                                                                                                                                         | GGG TCT CTG GGC AGT AAC TG                                             |     |

124

125

126

127

128

129

130

131 **Table S2. Muropeptide peaks, their retention time and relative abundance (peak area)**132 **obtained through RP-HPLC analysis**

| Peak | mc <sup>2</sup> 155  |                        | Δms33/32             |                        |
|------|----------------------|------------------------|----------------------|------------------------|
|      | Retention Time (min) | Relative abundance (%) | Retention Time (min) | Relative abundance (%) |
| 1    | 3.6                  | 7.4                    | 3.6                  | 5.7                    |
| 2    | <b>4.0</b>           | <b>16.4</b>            | <b>4.0</b>           | <b>6.2</b>             |
| 3    | 4.2                  | 4.7                    | 4.1                  | 2.8                    |
| 4    | 4.7                  | 27.6                   | 4.4                  | 0.4                    |
| 5    | 5.1                  | 6.5                    | 4.7                  | 27.3                   |
| 6    | 5.3                  | 9.2                    | 5.1                  | 9.7                    |
| 7    | 5.5                  | 4.1                    | 5.4                  | 1.5                    |
| 8    | <b>5.7</b>           | <b>1.1</b>             | 5.6                  | 5.8                    |
| 9    | 6.0                  | 9.4                    | <b>5.7</b>           | <b>21.1</b>            |
| 10   | 6.2                  | 8.2                    | 6.2                  | 12.2                   |
| 11   | <b>7.0</b>           | <b>3.8</b>             | <b>7.0</b>           | <b>0.4</b>             |
| 12   | 8.6                  | 1.3                    | 7.2                  | 0.8                    |
| 13   | 11.3                 | 0.6                    | 7.5                  | 2.6                    |
| 14   | -                    | -                      | 8.9                  | 2.5                    |
| 15   | -                    | -                      | 9.4                  | 1.1                    |

133 Numerals in 'bold' shows the similar retention time from both the strain with &gt;2.5-fold

134 difference in the relative abundance, were selected for the MALDI-ToF analysis. Values of the

135 retention time and peak area percent are shown as per the instrument, RP-HPLC display and  
136 rounded off to the nearest total.

137 **References:**

- 138 1. Pelicic V, Reyrat JM, Gicquel B. 1996. Expression of the *Bacillus subtilis* sacB gene  
139 confers sucrose sensitivity on mycobacteria. *J Bacteriol* 178:1197-9.
- 140 2. Ghosh AS, Chowdhury C, Nelson DE. 2008. Physiological functions of D-alanine  
141 carboxypeptidases in *Escherichia coli*. *Trends Microbiol* 16:309-317.
- 142 3. Bansal A, Kar D, Murugan RA, Mallick S, Dutta M, Pandey SD, Chowdhury C, Ghosh  
143 AS. 2015. A putative low-molecular-mass penicillin-binding protein (PBP) of  
144 *Mycobacterium smegmatis* exhibits prominent physiological characteristics of DD-  
145 carboxypeptidase and beta-lactamase. *Microbiology* 161:1081-1091.
- 146 4. Kumar P, Arora K, Lloyd JR, Lee IY, Nair V, Fischer E, Boshoff HI, Barry CE, 3rd.  
147 2012. Meropenem inhibits D,D-carboxypeptidase activity in *Mycobacterium*  
148 *tuberculosis*. *Mol Microbiol* 86:367-81.

149

150
